# Supplementary material for: Association of the Recessive Allele vrn-D1 With Winter Frost Tolerance in Bread Wheat
Source: Front Plant Sci. 2022 Jun 6;13:879768. doi: 10.3389/fpls.2022.879768 (PMC9207342; doi:10.3389/fpls.2022.879768)
Supplement: Supplementary file 7 [file Table_6.XLSX]

## Sheet: Sheet1
	Supplementary Table 6 Significant pathway based on KEGG analysis
	Pathway	KO_ID	SNP_gene	SNP_gene_all	P-value
	Common genes shared by Lunxuan 103 and its parents
	mRNA surveillance pathway	ko03015	37	796	1.01e-05
	RNA transport	ko03013	42	796	0.0004465
	Endocytosis	ko04144	34	796	0.0016332
	Lysine degradation	ko00310	14	796	0.0021727
	Caffeine metabolism	ko00232	3	796	0.0093983
	Carbon metabolism	ko01200	46	796	0.0101553
	Folate biosynthesis	ko00790	6	796	0.0154972
	Spliceosome	ko03040	40	796	0.0168569
	ABC transporters	ko02010	9	796	0.0209561
	Phosphatidylinositol signaling system	ko04070	15	796	0.0307115
	Glycerolipid metabolism	ko00561	16	796	0.0349794
	Thiamine metabolism	ko00730	5	796	0.0440966
	Pyruvate metabolism	ko00620	18	796	0.0443116
	Special genes of Shimai 12 to Lunxuan 103
	Nicotinate and nicotinamide metabolism	ko00760	3	162	0.0072855
	One carbon pool by folate	ko00670	3	162	0.0082903
	Lysine biosynthesis	ko00300	3	162	0.0099432
	Cysteine and methionine metabolism	ko00270	7	162	0.0257909
	Steroid biosynthesis	ko00100	5	162	0.030768
	2-Oxocarboxylic acid metabolism	ko01210	5	162	0.030768
	Biosynthesis of amino acids	ko01230	12	162	0.037474
	N-Glycan biosynthesis	ko00510	4	162	0.0403296
	Special genes of Shijiazhuang 8 to Lunxuan 103
	Citrate cycle (TCA cycle)	ko00020	4	86	0.0070571
	Glyoxylate and dicarboxylate metabolism	ko00630	4	86	0.0126218
	Valine, leucine and isoleucine degradation	ko00280	3	86	0.0197289
	One carbon pool by folate	ko00670	2	86	0.0205809
	Sphingolipid metabolism	ko00600	3	86	0.0206477
	Ubiquitin mediated proteolysis	ko04120	7	86	0.0248728
	Valine, leucine and isoleucine biosynthesis	ko00290	2	86	0.0271201
	N-Glycan biosynthesis	ko00510	3	86	0.0311149
	Pyruvate metabolism	ko00620	4	86	0.0371958
	Propanoate metabolism	ko00640	2	86	0.0434824
	Other glycan degradation	ko00511	2	86	0.0446772
	Caffeine metabolism	ko00232	1	86	0.049123
	Special genes to Lunxuan 103
	Lipoic acid metabolism	ko00785	1	25	0.0259726
	Basal transcription factors	ko03022	2	25	0.0310903
	Non-homologous end-joining	ko03450	1	25	0.0457244
	Vitamin B6 metabolism	ko00750	1	25	0.0471205
